# Supplementary material for: pyTFM: A tool for traction force and monolayer stress microscopy
Source: PubMed Central journal article supplement (PMC8248623; doi:10.1371/journal.pcbi.1008364), 2021-06-21
Supplement: pcbi.1008364.s002.pdf [file pcbi.1008364.s002.pdf]

# 1 Cell culture and experimental procedure

Elastic polyacrylamide-bis-acrylamide (PAA) hydrogels for traction microscopy (7,85% (w/v) acrylamide and 0.27% (w/v) bis-acrylamide) were prepared according to [1]. The Young's modulus and of the gels was 18.5 kPa [2].

Green fluorescent carboxylate-modified 1  $\mu\text{m}$  beads (Invitrogen) were suspended in the polyacrylamide mixture (5  $\mu\text{l}$  in 500  $\mu\text{l}$ ), APS and TEMED was added and 28  $\mu\text{l}$  of solution was pipetted to each 25  $\mu\text{l}$  Gene Frame (Thermo Scientific) and covered with activated coverslips. To form a uniform bead layer on the top of the PAA gels, Gene Frames with PAA mixture were centrifuged at 300 g for 30 min at 4  $^{\circ}\text{C}$  prior the gel polymerisation. Polymerised gels were stuck at the bottom of 35 mm Petri dishes with 13 mm holes (Cell EG) [3]. The gel surface was activated with 0.5 mg/ml sulfo-SANPAH (Thermo Scientific) and coated with 50  $\mu\text{g}/\text{ml}$  collagen I (Gibco).

MDCK cells were cultured in DMEM media (Sigma-Aldrich) supplemented with 10% foetal bovine serum (Gibco) and 1% penicillin/streptomycin (Sigma-Aldrich) in a cell culture incubator (5%  $\text{CO}_2$ , 37  $^{\circ}\text{C}$ ). 30 000 MDCK cells were seeded in each 35 mm dish 48 h prior to imaging, to allow for the formation of cell colonies. Imaging was performed using Dragonfly spinning disc confocal microscope (Andor) equipped with a 20x water-immersion objective, Zyla sCMOS camera with 1.5x zoom and climate chamber (Okolab). Images were acquired using Fusion software (Andor). For each field of view with cell colony a set of three images was taken: 1) Image of cell membranes (facilitated either by a tdTomato-farnesyl membrane tag). 2) Image of fluorescent beads underneath cell colonies and 3) Image of fluorescent beads after cell detachment with Trypsin/EDTA (0.5/0.02%) solution (Sigma) for 20 minutes. The images of beads in the tensed and relaxed state were analyzed in pyTFM with the following analysis parameters:

**Table 1. pyTFM analysis parameters for the analysis of a MDCK cell colony.**

|                 |                     |
|-----------------|---------------------|
| Young's modulus | 18.5 kPa            |
| Poisson's ratio | 0.49                |
| PIV window size | 20 $\mu\text{m}$    |
| PIV overlap     | 19 $\mu\text{m}$    |
| pixel size      | 0.201 $\mu\text{m}$ |
| gel height      | 300 $\mu\text{m}$   |

## References

1. Pelham RJ, Wang Y. Cell locomotion and focal adhesions are regulated by substrate flexibility. *Proceedings of the National Academy of Sciences*. 1997;94(25):13661–13665. doi:10.1073/pnas.94.25.13661.
2. Yeung T, Georges PC, Flanagan LA, Marg B, Ortiz M, Funaki M, et al. Effects of substrate stiffness on cell morphology, cytoskeletal structure, and adhesion. *Cell Motility and the Cytoskeleton*. 2004;60(1):24–34. doi:10.1002/cm.20041.
3. Mierke CT, Kollmannsberger P, Zitterbart DP, Smith J, Fabry B, Goldmann WH. Mechano-Coupling and Regulation of Contractility by the Vinculin Tail Domain. *Biophysical Journal*. 2008;94(2):661–670. doi:10.1529/biophysj.107.108472.
